# Supplementary material for: Higher serum galactose-deficient immunoglobulin A1 concentration is associated with stronger mesangial cellular inflammatory response and more severe histologic findings in immunoglobulin A nephropathy
Source: PubMed Central journal article supplement (PMC6452211; doi:10.1093/ckj/sfy068), 2018-08-03
Supplement: sfy068_spplementary_data.pdf [file sfy068_spplementary_data.pdf]

Supplementary figure 1

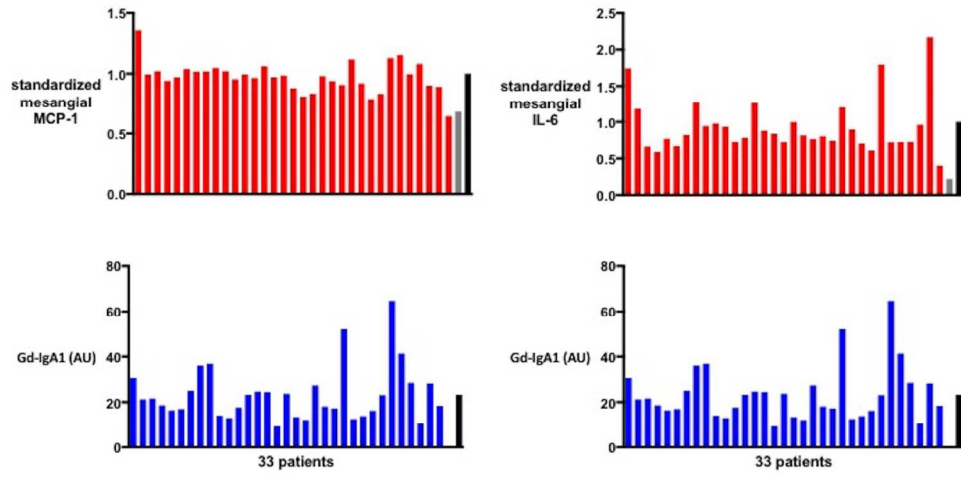

Supplementary Figure 1. Serum Gd-IgA1 and mesangial production of MCP-1 and IL-6. Grey bar represents the negative control and black bar the calibration positive control.

1058x793mm (72 x 72 DPI)

Supplementary figure 2

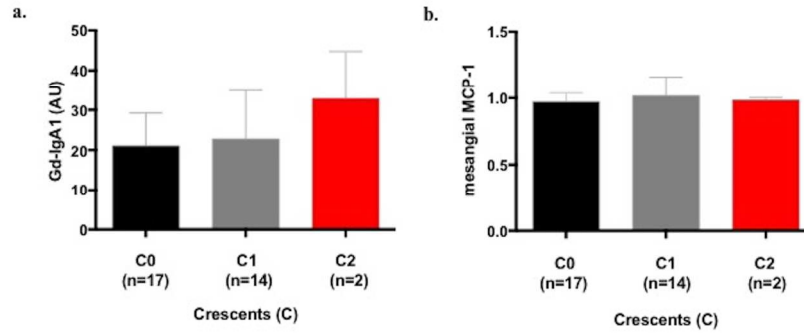

Supplementary Figure 2. Serum Gd-IgA1 and MCP-1 concentration in cell culture supernatant according to Oxford classification C score, Gd-IgA1 (a) & mesangial MCP-1 (b)

1058x793mm (72 x 72 DPI)
